# Supplementary material for: New pentose dimers with bicyclic moieties from pretreated biomass
Source: Royal Society of Chemistry journal article supplement (doi:10.1039/c6ra25432b), 2017-01-01
Supplement: c6ra25432b1.pdf [file c6ra25432b1.pdf]

## SUPPLEMENTARY INFORMATION

New pentose dimers with bicyclic moieties from pretreated biomass

Helena Rasmussen<sup>a</sup>, Hanne R. Sørensen<sup>a</sup>, David Tanner<sup>b</sup> and Anne S. Meyer<sup>c\*</sup>

<sup>a</sup> DONG Energy, Kraftværksvej 53, DK-7000 Fredericia, Denmark

<sup>b</sup> Dept. of Chemistry, Technical University of Denmark, DK-2800 Lyngby, Denmark.

<sup>c</sup> Center for BioProcess Engineering, Dept. of Chemical and Biochemical Engineering, Technical University of Denmark, DK-2800 Lyngby, Denmark.

\*Corresponding author: e-mail: am@kt.dtu.dk; Tel: (+45) 45 25 2800

**Table 1. Comparison of water fractions from 2-butanone extraction of LfHP 1 and LfHP2.**

| Retention time (min) | Ions, <i>m/z</i> [M- H <sup>+</sup> ]                                           | Source | Compounds                                                      |
|----------------------|---------------------------------------------------------------------------------|--------|----------------------------------------------------------------|
| 0.34                 | 281.08670, 413.12897, 545.17053                                                 | LfHP 1 | Pentoses DP2, DP 3, DP 4.                                      |
| 0.34                 | 281.0864, 413.12854, 545.17017                                                  | LfHP 2 | Pentoses DP2, DP 3, DP 4.                                      |
| 0.47                 | 281.08667, 413.12878, 545.17102, 677.21277                                      | LfHP 1 | Pentoses DP2, DP 3, DP 4, DP 5                                 |
| 0.47                 | 281.0849, 413.12857, 545.17041, 677.21246                                       | LfHP 2 | Pentoses DP2, DP 3, DP 4, DP 5                                 |
| 0.61                 | 545.17047, 677.21411, 809.25598                                                 | LfHP 1 | Pentoses DP 4, DP 5, DP6.                                      |
| 0.58                 | 545.17053, 677.21307, 809.25549                                                 | LfHP 2 | Pentoses DP 4, DP 5, DP6.                                      |
| 0.89                 | 677.21252, 809.25641, 941.29730                                                 | LfHP 1 | Pentoses DP 5, DP 6, DP 7.                                     |
| 0.88                 | 677.21240, 809.25648, 941.29651                                                 | LfHP 2 | Pentoses DP 5, DP 6, DP 7.                                     |
| 1.15                 | 455.13885, 809.25500, 941.29755                                                 | LfHP 1 | Pentoses + 1 acetyl, DP 3. Pentoses DP 6, DP 7.                |
| 1.15                 | 455.13895, 809.25488, 941.29688                                                 | LfHP 1 | Pentoses + 1 acetyl, DP 3. Pentoses DP 6, DP 7.                |
| 1.34                 | 941.29785, 1073.33887                                                           | LfHP 1 | Pentoses DP 7, DP 8.                                           |
| 1.34                 | 941.29651, 1073.33862                                                           | LfHP 2 | Pentoses DP 7, DP 8.                                           |
| 1.48                 | 587.18073, 941.29657                                                            | LfHP 1 | Pentoses + 1 acetyl, DP 4. Pentose DP 7.                       |
| 1.48                 | 587.18073, 941.29669                                                            | LfHP 2 | Pentoses + 1 acetyl, DP 4. Pentose DP 7.                       |
| 1.70                 | 941.29742, 1073.34097, 1205.38257                                               | LfHP 1 | Pentoses DP 7, DP 8, DP 9                                      |
| 1.70                 | 587.18115, 719.22363, 851.26581, 983.30768                                      | LfHP 2 | Pentoses + 1 acetyl, DP 4, DP 5, DP 6, DP 7                    |
| 1.78                 | 587.18103, 719.22339, 851.26563, 983.30780, 1115.35010, 1247.39148, 1379.43311  | LfHP 1 | Pentoses + 1 acetyl, DP 4, DP 5, DP 6, DP 7, DP 8, DP 9, DP 10 |
| 1.78                 | 587.18109, 719.22333, 851.26569, 983.30768, 1115.34949, 1247.39160, 1379.43335  | LfHP 2 | Pentoses + 1 acetyl, DP 4, DP 5, DP 6, DP 7, DP 8, DP 9, DP 10 |
| 1.96                 | 629.19171, 761.23376, 893.27631, 1025.31848, 1157.36035, 1289.40210, 1421.44312 | LfHP 1 | Pentoses + 2 acetyl, DP 4, DP 5, DP 6, DP 7, DP 8, DP 9.       |
| 1.96                 | 629.19183, 761.23413, 893.27649, 1025.31824, 1157.36023, 1289.40283, 1421.44348 | LfHP 2 | Pentoses + 2 acetyl, DP 4, DP 5, DP 6, DP 7, DP 8, DP 9.       |

**Table 2. Comparison of 2-butanone fractions from 2-butanone extraction of LfHP 1 and LfHP2. Please refer to ref 14 for structures of compounds marked in italic. Compounds marked with \* were subjected to fragmentation and showed the same fragmentation pattern in LfHP 1 and LfHP 2.**

| Retention time (min) | Ions, <i>m/z</i> [M- H <sup>+</sup> ]                  | Source | Compounds                           |
|----------------------|--------------------------------------------------------|--------|-------------------------------------|
| 2.85                 | 163.03880*                                             | LfHP 1 | Compound 1                          |
| 2.85                 | 163.03870*                                             | LfHP 2 | Compound 1                          |
| 3.04                 | 181.04932                                              | LfHP 1 | Not determined                      |
| 3.04                 | 181.04929                                              | LfHP 2 | Not determined                      |
| 3.20                 | 265.07108, 325.09229, 457.13498, 589,17682             | LfHP 1 | Pentose + feruloyl, DP 2, DP 3.     |
| 3.20                 | 265.07068, 325.09167, 457.13583, 589,17706             | LfHP 2 | Pentose + feruloyl, DP 2, DP 3.     |
| 3.28                 | 265.07095, 327.08679, 357.09720, 387.10751*            | LfHP 1 |                                     |
| 3.28                 | 265.07071, 327.08627, 357.09689, 387.10736*            | LfHP 2 |                                     |
| 3.35                 | 327.08643, 357.09790, 387.10760*                       | LfHP 1 |                                     |
| 3.35                 | 327.08630, 357.09698, 387.10760*                       | LfHP 2 |                                     |
| 3.41                 | 327.08655, 387.10889*                                  | LfHP 1 |                                     |
| 3.40                 | 327.08624, 387.09686*                                  | LfHP 2 |                                     |
| 3.52                 | 357.09763, 387.10760*, 601.17664                       | LfHP 1 | Pentose + 1 acetyl + cumaroyl, DP 3 |
| 3.52                 | 307.04510*, 357.09689, 387.10736*, 601.17670           | LfHP 2 | Pentose + 1 acetyl + cumaroyl, DP 3 |
| 3.63                 | 187.09630, 307.04520, 323.11258, 387.10849*, 631.18738 | LfHP 1 | Pentose + 1 acetyl + feruloyl, DP 3 |
| 3.63                 | 187.09613, 307.04489* 323.11227, 387.10745*, 631.18695 | LfHP 2 | Pentose + 1 acetyl + feruloyl, DP 3 |
| 3.75                 | 239.12767, 275.09158, 305.10199, 387.10757*            | LfHP 1 |                                     |
| 3.75                 | 239.12756, 275.09137, 305.10172, 387.10721*            | LfHP 2 |                                     |
| 3.89                 | 425.08713                                              | LfHP 1 | Not determined                      |
| 3.89                 | 425.08713                                              | LfHP 2 | Not determined                      |
| 4.21                 | 371.11252, 383.11255 401.12302,                        | LfHP 1 |                                     |
| 4.21                 | 371.11218, 383.11212 401.12259,                        | LfHP 2 |                                     |
| 4.58                 | 301.07056                                              | LfHP 1 |                                     |
| 4.58                 | 301.07047                                              | LfHP 2 |                                     |
